# Supplementary material for: International authorship and collaboration across bioRxiv preprints
Source: eLife. 2020 Jul 27;9:e58496. doi: 10.7554/eLife.58496 (PMC7384855; doi:10.7554/eLife.58496)
Supplement: Figure 1—source data 2. — Each row represents a country, sorted in descending order using the ‘cn_total’ and ‘straight_count’ columns. The ‘country’ column is the country name as recorded in the ROR dataset. ‘cn_total’ lists the number of preprints attributed to that country using the complete-normalizing counting technique. ‘straight_count’ lists the number of preprints attributed to that country using the straight-counting technique. [file elife-58496-fig1-data2.csv]

country	cn_total	straight_count
Liechtenstein	0.00534759358288770053	0
Guinea	0.01052631578947368421	0
Liberia	0.02105263157894736842	0
Mauritius	0.02439024390243902439	0
Montenegro	0.02439024390243902439	0
Sierra Leone	0.04210526315789473684	0
Faroe Islands	0.05000000000000000000	0
Paraguay	0.06250000000000000000	0
Myanmar	0.08333333333333333334	0
Maldives	0.13333333333333333334	0
Central African Republic	0.14761904761904761905	0
Jersey	0.19020979020979020980	0
Malta	0.20000000000000000000	0
Saint Kitts and Nevis	0.21590909090909090909	0
Suriname	0.25000000000000000000	0
South Sudan	0.25000000000000000000	0
Libya	0.31709956709956709956	0
Seychelles	0.32275132275132275132	0
Guadeloupe	0.32521645021645021645	0
Korea (Democratic People's Republic of),	0.33333333333333333333	0
Cabo Verde	0.45833333333333333333	0
El Salvador	0.49999999999999999998	0
Eswatini	0.50000000000000000000	0
Namibia	0.50793650793650793651	0
Honduras	0.54406288156288156288	0
Haiti	0.58815958815958815958	0
Martinique	0.58823529411764705880	0
Bosnia and Herzegovina	0.59445125770343923043	0
Grenada	0.63335142567665364016	0
New Caledonia	0.75681818181818181818	0
Moldova, Republic of	0.78431372549019607842	0
Burundi	0.96111842582430817722	0
French Guiana	1.08109170522963626411	0
French Polynesia	1.14069264069264069264	0
Fiji	1.52840909090909090908	0
Georgia	1.66080823767337397178	0
Belarus	1.98610613524406627853	0
Mali	2.04798714357537886951	0
Papua New Guinea	2.12303274428274428274	0
Curaçao	0.40952380952380952381	1
Mauritania	0.50000000000000000000	1
Uzbekistan	0.59335576114381833473	1
Azerbaijan	0.72527472527472527474	1
Turkmenistan	0.75000000000000000000	1
Togo	0.88599529125844915317	1
Botswana	0.97735597735597735597	1
Syrian Arab Republic	0.98565323565323565323	1
Belize	0.99999999999999999999	1
Kyrgyzstan	1.03030303030303030302	1
Dominican Republic	1.21285731812047601520	1
Lao People's Democratic Republic	1.26117306606437041220	1
Bermuda	1.90588460786819199952	1
Jamaica	1.90719133807369101486	1
Jordan	2.14138407234255376813	1
Senegal	6.93469428748066518961	1
Bahrain	0.66666666666666666667	2
Mongolia	1.10746258384455414976	2
Afghanistan	1.49999999999999999999	2
Nicaragua	1.56547619047619047620	2
Algeria	1.87424242424242424242	2
Guyana	2.02857142857142857137	2
North Macedonia	2.10695422328172447178	2
Monaco	2.23571428571428571427	2
Yemen	2.27133650663062427769	2
Rwanda	2.28074229691876750700	2
Congo, Democratic Republic of the	2.34138431013431013433	2
Kazakhstan	3.23225806451612903224	2
Madagascar	3.70543451646392822864	2
Cambodia	3.98817238317238317245	2
Gabon	2.34845095380809666525	3
Guinea-Bissau	2.51594718845863010623	3
Mozambique	2.52818931839116868551	3
Gambia	2.67839428996530861665	3
Zambia	2.77009200231816864677	3
Oman	2.81191797718162195496	3
Brunei Darussalam	3.02747252747252747254	3
Barbados	3.20725372588949938391	3
Palestine, State of	3.91495400734531169311	3
Latvia	4.46648688735198801449	3
Lebanon	4.87310416191995139361	3
Trinidad and Tobago	6.32412824948321905719	3
Serbia	6.97284118732883254683	3
Guatemala	3.38523143523143523143	4
Réunion	3.43294009911656970483	4
Armenia	4.30448717948717948718	4
Bolivia (Plurinational State of),	4.55547619047619047618	4
Tunisia	4.63483339180955864173	4
Zimbabwe	4.10211027711027711027	5
Morocco	5.93899331662489557222	5
Kuwait	6.17932062113077975455	5
Iraq	7.32131019595956482350	5
Burkina Faso	8.39578373704648373126	5
Lithuania	6.94170113843173558359	6
Greenland	7.72879488158899923605	6
Benin	10.52366126305754788725	6
Malawi	8.10791131222968667341	8
United Arab Emirates	11.20458456401105192611	8
Viet Nam	20.48685754550709457181	8
Cuba	8.81956042323689382510	10
Tanzania, United Republic of	19.48206625442515388498	11
Macao	8.61176643065894647533	13
Cameroon	12.20324413778323390953	13
Slovakia	18.99865908650332806970	13
Cyprus	12.27601908874353543294	14
Ukraine	18.67915019921598868962	14
Uganda	28.70825731668552904994	14
Nepal	11.86799676931255878624	15
Bulgaria	13.95171928294702909496	15
Costa Rica	17.49834948163895532317	16
Romania	20.81495975032508636393	17
Indonesia	21.46213318576543995759	17
Slovenia	21.59277191227894653006	19
Croatia	25.53922303602388613848	20
Ecuador	25.94718559218559218555	20
Sri Lanka	23.31409996092658631346	22
Peru	27.88159149658870661096	23
Ghana	23.73978185238218467792	26
Luxembourg	29.22216536105289167586	26
Iceland	25.63425708208496690956	28
Venezuela (Bolivarian Republic of),	28.18967181248851379044	28
Uruguay	37.73071088750356717232	33
Nigeria	42.08032704053829242183	37
Côte d'Ivoire	39.53845641279306375638	38
Egypt	45.58957130201356669747	41
Panama	34.55362187469360276758	42
Sudan	42.43777014509111695815	42
Kenya	57.93466066885184532239	47
Pakistan	56.08533386415088171013	48
Estonia	53.62395322857725236654	49
Qatar	54.36917651902397024626	50
Bangladesh	62.60287767752281818776	50
Philippines	50.39116780639933150349	51
Thailand	75.36194490351092097206	54
Ethiopia	63.19173419086260653082	57
Greece	71.39793813479614652266	63
Colombia	76.89533947064482348483	70
Malaysia	80.14028771503228656509	78
Turkey	92.57823581861483567521	80
Saudi Arabia	82.70944990366085895414	87
Hungary	124.94706833404715644770	123
Iran (Islamic Republic of),	141.14395773704362467388	123
Chile	110.59262869213191585352	128
Czechia	138.62581195660917981813	133
Argentina	158.83964474806618810150	163
Ireland	162.83308120758534217336	169
Poland	190.04020213592279265473	170
South Africa	185.57192996687019342882	182
Mexico	192.31072764332821476653	188
Taiwan, Province of China	193.92130917646159920961	209
New Zealand	238.79066839022248811118	237
Portugal	232.26287040018865362746	250
Russian Federation	312.17501786641742257652	283
Austria	304.64080889566625592833	311
Singapore	318.09877201588886214802	328
Finland	360.78648643294590105788	360
Korea, Republic of	360.49679406310653531975	368
Norway	372.92189331852896426051	395
Belgium	467.72691336649559809850	472
Denmark	548.35664715480165018879	584
Israel	587.71389762351540335879	640
Brazil	714.12461203879307724513	704
Italy	736.61605629529842616978	728
Sweden	787.94952364264472508182	795
Spain	947.31266672575720453392	953
India	1146.13802033201636993485	1212
Japan	1298.50508963977839668883	1263
Netherlands	1257.24093357658407589136	1291
Switzerland	1287.92934501607553643626	1364
Australia	1664.21912755725967466333	1755
Canada	2319.02310435474609288905	2380
China	2875.68913610055053520631	2778
France	2721.66429694931819878799	2863
Germany	3591.47004341927904193020	3668
UNKNOWN	6874.14815354386699316504	4985
United Kingdom of Great Britain and Northern Ireland	6666.21461464042496177997	7151
United States of America	25487.71697339078153566810	26598
