# Supplementary material for: International authorship and collaboration across bioRxiv preprints
Source: eLife. 2020 Jul 27;9:e58496. doi: 10.7554/eLife.58496 (PMC7384855; doi:10.7554/eLife.58496)
Supplement: Figure 2—source data 1. — Each row represents a single country, sorted in descending order by the ‘citable_total’ and ‘senior_author_preprints’ columns. The ‘alpha2’ column indicates the two-letter country code defined in ISO 3166–1. ‘country’ indicates the country name as recorded in the SCImago dataset. The ‘y2014’ through ‘y2018’ columns list the total number of citable documents attributed to that country in the SCImago dataset for the year specified. ‘citable_total’ indicates the sum of all citable documents from that country from 2014 through 2018. ‘senior_author_preprints’ lists the number of senior-author preprints attributed to that country from 2013 through 2019. [file elife-58496-fig2-data1.csv]

alpha2	country	y2014	y2015	y2016	y2017	y2018	y2019	citable_total	senior_author_preprints
US	United States	569415	569768	571797	577629	570104	605796	3464509	26598
CN	China	482195	451002	484506	519764	569227	669877	3176571	2778
GB	United Kingdom	162654	166159	169669	171587	172148	188259	1030476	7151
DE	Germany	157637	156878	160846	161420	158437	167305	962523	3668
IN	India	123308	129656	140479	139901	152110	173574	859028	1212
JP	Japan	123736	118378	119966	120324	118409	123834	724647	1263
FR	France	110900	109871	111289	111057	106278	109099	658494	2863
IT	Italy	97004	99250	101129	103260	102581	113243	616467	728
CA	Canada	91646	91870	93346	93777	95047	104950	570636	2380
AU	Australia	81064	82763	85330	86783	89153	100527	525620	1755
ES	Spain	82419	81327	83601	84965	84147	93133	509592	953
KR	South Korea	76255	78657	79576	79709	79646	86242	480085	368
RU	Russian Federation	56442	65903	79025	86638	95359	108786	492153	283
BR	Brazil	64471	66005	69619	72951	74195	80430	427671	704
NL	Netherlands	52305	52122	53359	53759	53784	58783	324112	1291
IR	Iran	43405	43538	50783	53343	54915	62836	308820	123
PL	Poland	39911	41340	44071	44726	45365	47450	262863	170
CH	Switzerland	40065	40623	41537	42686	41973	44583	251467	1364
TR	Turkey	37805	40243	43196	40769	39847	47226	249086	80
SE	Sweden	35505	36298	37423	37820	38073	41554	226673	795
TW	Taiwan	40506	36732	35668	34441	33455	36578	217380	209
BE	Belgium	29861	30128	30529	30501	30295	32215	183529	472
MY	Malaysia	27737	26472	29072	31115	31102	35111	180609	78
DK	Denmark	23478	24383	24793	25259	25662	27808	151383	584
CZ	Czech Republic	22245	23101	23272	24081	22539	24416	139654	133
AT	Austria	21896	22636	23182	23420	23107	25404	139645	311
PT	Portugal	21376	21899	22281	22775	23023	26505	137859	250
MX	Mexico	19689	19922	21115	22302	22515	25823	131366	188
ZA	South Africa	18620	18481	20353	21421	21843	26263	126981	182
SA	Saudi Arabia	17329	18837	20026	20408	21598	26772	124970	87
NO	Norway	18147	18230	19659	20456	21017	23311	120820	395
SG	Singapore	18246	18719	19577	20005	19903	21513	117963	328
IL	Israel	18123	18537	18901	19155	19380	21345	115441	640
FI	Finland	18226	18417	19000	18792	18750	20943	114128	360
EG	Egypt	15039	16099	18332	17702	20074	24356	111602	41
HK	Hong Kong	15945	15472	16492	17666	19571	23051	108197	0
GR	Greece	17269	16886	17156	16813	16835	18739	103698	63
ID	Indonesia	6509	8043	11965	19948	31708	44194	122367	17
RO	Romania	14496	14690	14461	15275	13982	15538	88442	17
PK	Pakistan	11347	11946	14033	16443	18885	23461	96115	48
TH	Thailand	12881	12456	13901	15364	16485	18877	89964	54
NZ	New Zealand	13135	13001	13519	13949	14252	15928	83784	237
AR	Argentina	12273	12277	12713	12973	13185	13755	77176	163
IE	Ireland	11858	11699	12446	12687	13111	14959	76760	169
CL	Chile	10426	10980	12358	12494	13295	14691	74244	128
UA	Ukraine	10089	10196	10777	11716	12914	15350	71042	14
HU	Hungary	10269	10109	10307	10468	10582	11133	62868	123
CO	Colombia	7820	8482	9734	10846	11498	13319	61699	70
SK	Slovakia	7754	7282	8070	8450	7757	8446	47759	13
TN	Tunisia	6317	6923	7651	8166	7790	7757	44604	4
RS	Serbia	7081	6975	7299	7444	7069	7933	43801	3
NG	Nigeria	5823	5626	6423	6877	8346	10679	43774	37
HR	Croatia	6181	6283	6298	6709	6529	6962	38962	20
DZ	Algeria	5135	5769	6526	7032	6960	8110	39532	2
SI	Slovenia	5783	5925	5887	5962	5729	6201	35487	19
VN	Viet Nam	3857	4363	5597	6252	7908	12055	40032	8
MA	Morocco	4434	4532	5673	6460	6385	7888	35372	5
AE	United Arab Emirates	3518	4441	4968	5774	6521	8619	33841	8
BG	Bulgaria	4005	3855	4159	4440	4944	5752	27155	15
BD	Bangladesh	3797	3592	4143	4775	5024	6976	28307	50
IQ	Iraq	1943	2067	3014	4087	8174	12690	31975	5
LT	Lithuania	3390	3405	3365	3616	3523	3966	21265	6
QA	Qatar	2602	2991	3498	3396	3550	4129	20166	50
KZ	Kazakhstan	2358	2467	3354	3464	3606	4545	19794	2
JO	Jordan	2478	2488	2928	3207	4122	5240	20463	1
EE	Estonia	2856	2812	2913	3043	2975	3589	18188	49
PH	Philippines	2000	2481	2851	3090	3398	4996	18816	51
LB	Lebanon	2130	2268	2607	2768	3081	3687	16541	3
KE	Kenya	2255	2306	2489	2723	2840	3321	15934	47
EC	Ecuador	971	1570	2325	3328	4131	4608	16933	20
ET	Ethiopia	1807	1816	2039	2739	3223	4196	15820	57
PE	Peru	1580	1879	2176	2573	2953	4004	15165	23
CY	Cyprus	1780	1879	2157	2449	2598	3044	13907	14
LV	Latvia	1590	1971	1988	2285	2111	2300	12245	3
GH	Ghana	1376	1607	1994	2176	2624	3357	13134	26
CU	Cuba	2185	2036	1867	1820	1624	1816	11348	10
BY	Belarus	1760	1702	1849	2010	2210	2412	11943	0
LU	Luxembourg	1814	1756	1828	1868	1968	2177	11411	26
LK	Sri Lanka	1199	1294	1736	1879	2094	2379	10581	22
VE	Venezuela	1879	1644	1536	1531	1286	1235	9111	28
OM	Oman	1299	1492	1663	1560	1723	2191	9928	3
KW	Kuwait	1316	1431	1474	1575	1714	2197	9707	5
IS	Iceland	1322	1407	1553	1535	1568	1724	9109	28
GE	Georgia	1028	1235	1621	1657	1837	2010	9388	0
UG	Uganda	1209	1351	1402	1581	1601	1912	9056	14
UY	Uruguay	1350	1277	1479	1417	1560	1801	8884	33
TZ	Tanzania	1261	1294	1347	1460	1526	1918	8806	11
CM	Cameroon	1113	1161	1272	1451	1601	1741	8339	13
MO	Macao	928	861	1208	1401	1553	2103	8054	13
NP	Nepal	965	1022	1157	1257	1365	1729	7495	15
AM	Armenia	1062	1033	1086	1072	1208	1315	6776	4
BA	Bosnia and Herzegovina	806	937	981	1205	1203	1323	6455	0
AZ	Azerbaijan	681	781	1013	1119	1235	1420	6249	1
CR	Costa Rica	806	800	897	1024	1054	1209	5790	16
MK	Macedonia	892	912	877	910	875	934	5400	2
SD	Sudan	644	647	831	784	921	952	4779	42
PR	Puerto Rico	794	706	779	765	702	744	4490	0
SN	Senegal	643	714	713	764	776	803	4413	1
ZW	Zimbabwe	610	566	689	756	788	935	4344	5
MT	Malta	528	581	627	712	773	832	4053	0
PS	Palestine	557	484	561	730	779	985	4096	3
MW	Malawi	477	516	575	679	709	797	3753	8
UZ	Uzbekistan	525	450	587	560	581	1435	4138	1
BF	Burkina Faso	453	539	524	535	566	581	3198	5
PA	Panama	467	490	514	561	582	735	3349	42
BW	Botswana	418	375	554	540	613	686	3186	1
ZM	Zambia	403	429	515	576	550	640	3113	3
SY	Syrian Arab Republic	515	519	492	415	417	546	2904	1
BH	Bahrain	401	348	460	497	611	932	3249	2
MD	Moldova	457	382	537	498	419	489	2782	0
AL	Albania	524	470	398	370	450	490	2702	0
BJ	Benin	399	423	400	478	495	578	2773	6
LY	Libya	476	428	372	430	443	520	2669	0
CG	Congo	437	417	419	402	437	420	2532	0
ME	Montenegro	390	358	430	466	445	527	2616	0
BN	Brunei Darussalam	347	402	464	454	420	536	2623	3
CI	Côte d’Ivoire	356	401	383	402	507	581	2630	38
YE	Yemen	373	320	372	440	497	654	2656	2
MN	Mongolia	326	318	358	402	462	586	2452	2
KH	Cambodia	284	327	378	385	428	482	2284	2
TT	Trinidad and Tobago	410	302	342	357	362	412	2185	3
MZ	Mozambique	241	317	344	407	425	502	2236	3
RW	Rwanda	248	299	337	357	433	488	2162	2
JM	Jamaica	346	306	304	315	301	390	1962	1
NA	Namibia	246	285	311	314	386	423	1965	0
MG	Madagascar	277	301	283	331	331	338	1861	2
BO	Bolivia	290	304	311	272	328	375	1880	4
MM	Myanmar	133	209	290	354	512	725	2223	0
FJ	Fiji	259	239	327	314	333	397	1869	0
MU	Mauritius	211	213	274	301	283	486	1768	0
ML	Mali	204	258	251	288	269	314	1584	0
GT	Guatemala	197	255	257	283	265	302	1559	4
LA	Laos	199	225	257	217	266	317	1481	1
PY	Paraguay	147	204	224	284	233	373	1465	0
KG	Kyrgyzstan	138	147	225	241	278	376	1405	1
GA	Gabon	184	183	175	179	182	199	1102	3
PG	Papua New Guinea	162	162	179	166	228	262	1159	0
NC	New Caledonia	188	185	171	162	174	183	1063	0
GM	Gambia	157	165	164	178	142	182	988	3
TG	Togo	156	161	160	143	178	211	1009	1
NE	Niger	134	174	165	148	155	189	965	0
GD	Grenada	139	108	122	187	208	209	973	0
AF	Afghanistan	96	77	160	195	226	315	1069	2
DO	Dominican Republic	105	133	134	166	169	263	970	1
MC	Monaco	106	129	143	167	158	218	921	2
SV	El Salvador	106	140	130	109	130	99	714	0
TJ	Tajikistan	96	117	118	138	142	219	830	0
LI	Liechtenstein	127	111	122	120	123	127	730	0
PF	French Polynesia	94	122	128	112	145	166	767	0
NI	Nicaragua	100	106	129	134	125	123	717	2
SL	Sierra Leone	68	105	137	136	136	150	732	0
SZ	Swaziland	106	110	100	130	133	154	733	0
GL	Greenland	105	126	107	107	121	130	696	6
HN	Honduras	80	97	89	133	157	197	753	0
KP	North Korea	18	18	29	47	438	220	770	0
AO	Angola	98	93	109	146	102	127	675	0
BB	Barbados	110	107	118	110	99	127	671	3
HT	Haïti	106	108	102	116	91	107	630	0
CD	Democratic Republic Congo	33	79	88	141	155	255	751	2
GN	Guinea	62	98	115	124	87	115	601	0
BT	Bhutan	73	80	93	96	100	132	574	0
GF	French Guiana	68	84	99	72	97	98	518	0
GP	Guadeloupe	121	85	83	53	49	56	447	0
FO	Faroe Islands	55	63	74	75	90	110	467	0
KN	Saint Kitts and Nevis	44	60	86	77	87	102	456	0
LR	Liberia	31	59	79	84	83	102	438	0
CF	Central African Republic	48	41	72	53	64	53	331	0
BI	Burundi	42	48	51	54	78	80	353	0
BS	Bahamas	44	44	40	68	64	87	347	0
MQ	Martinique	49	53	67	47	40	48	304	0
RE	Reunion	47	45	52	55	49	40	288	4
SC	Seychelles	43	60	46	56	43	55	303	0
GW	Guinea-Bissau	57	35	51	55	49	61	308	3
MR	Mauritania	40	37	54	46	61	77	315	1
SB	Solomon Islands	27	48	52	45	50	52	274	0
TD	Chad	31	37	44	56	53	61	282	0
LS	Lesotho	34	44	49	46	47	80	300	0
SR	Suriname	20	38	56	47	55	61	277	0
GU	Guam	52	38	31	42	52	43	258	0
BM	Bermuda	31	42	42	52	38	64	269	1
GY	Guyana	30	33	35	34	56	49	237	2
CV	Cape Verde	33	35	33	47	36	51	235	0
DM	Dominica	28	36	36	40	34	30	204	0
VU	Vanuatu	31	37	46	33	27	42	216	0
ER	Eritrea	29	29	26	36	46	52	218	0
TL	Timor-Leste	27	21	26	38	39	38	189	0
BZ	Belize	23	30	27	38	30	42	190	1
SM	San Marino	19	26	27	31	35	40	178	0
WS	Samoa	26	23	23	31	34	39	176	0
MV	Maldives	22	24	16	31	30	42	165	0
AD	Andorra	20	23	23	14	29	30	139	0
SO	Somalia	16	17	13	34	28	60	168	0
FK	Falkland Islands (Malvinas)	16	24	21	21	25	30	137	0
TM	Turkmenistan	45	20	12	16	9	10	112	1
DJ	Djibouti	24	17	19	21	21	20	122	0
FM	Federated States of Micronesia	14	16	20	22	23	13	108	0
KY	Cayman Islands	18	15	17	18	25	22	115	0
GQ	Equatorial Guinea	14	18	26	13	19	18	108	0
PW	Palau	12	17	12	21	20	27	109	0
AS	American Samoa	22	11	7	12	28	7	87	0
AG	Antigua and Barbuda	10	11	18	16	22	18	95	0
TO	Tonga	8	12	11	15	19	20	85	0
KM	Comoros	6	8	17	12	18	19	80	0
VI	Virgin Islands (U.S.)	15	9	9	10	16	10	69	0
AW	Aruba	19	8	13	12	6	18	76	0
GI	Gibraltar	13	19	12	7	5	6	62	0
AI	Anguilla	7	12	19	6	9	10	63	0
LC	Saint Lucia	3	13	12	9	12	13	62	0
????	Netherlands Antilles	12	7	5	9	8	5	46	0
CK	Cook Islands	10	7	8	9	6	10	50	0
VG	Virgin Islands (British)	9	6	11	7	6	8	47	0
MS	Montserrat	8	9	8	7	4	5	41	0
SH	Saint Helena	3	2	5	16	8	4	38	0
VC	Saint Vincent and the Grenadines	5	4	9	10	5	20	53	0
MH	Marshall Islands	6	8	5	4	9	8	40	0
MP	Northern Mariana Islands	3	12	4	6	7	6	38	0
TC	Turks and Caicos Islands	3	8	9	5	5	3	33	0
KI	Kiribati	7	6	6	7	3	17	46	0
????	Vatican City State	1	3	2	10	8	19	43	0
ST	Sao Tome and Principe	4	3	2	8	5	11	33	0
YT	Mayotte	6	1	2	5	4	7	25	0
TV	Tuvalu	6	2	3	2	4	2	19	0
SJ	Svalbard and Jan Mayen	0	0	3	3	6	13	25	0
NR	Nauru	3	2	2	0	3	1	11	0
IO	British Indian Ocean Territory	0	3	1	1	3	5	13	0
UM	United States Minor Outlying Islands	1	3	1	1	2	1	9	0
GS	South Georgia and the South Sandwich Islands	1	0	0	3	3	2	9	0
NU	Niue	3	0	1	1	1	3	9	0
TK	Tokelau	0	1	3	0	1	0	5	0
TF	French Southern Territories	1	0	0	1	2	0	4	0
CX	Christmas Island	1	0	0	1	1	0	3	0
NF	Norfolk Island	1	0	1	1	0	0	3	0
WF	Wallis and Futuna	0	2	0	1	0	2	5	0
BV	Bouvet Island	0	0	1	0	1	1	3	0
EH	Western Sahara	0	2	0	0	0	0	2	0
HM	Heard Island and McDonald Islands	0	0	1	0	0	0	1	0
PN	Pitcairn	0	1	0	0	0	0	1	0
PM	Saint Pierre and Miquelon	0	0	0	0	0	0	0	0
