# Supplementary material for: International authorship and collaboration across bioRxiv preprints
Source: eLife. 2020 Jul 27;9:e58496. doi: 10.7554/eLife.58496 (PMC7384855; doi:10.7554/eLife.58496)
Supplement: Figure 3—source data 2. — Each row represents a combination of two countries. The ‘contributor’ column indicates the name of the contributor country. ‘senior’ indicates the name of the country that appears as a senior author. ‘p’ lists the p-value of a Fisher’s exact test, as described in the ‘Methods’ section. ‘with’ lists the number of preprints that include an author from the ‘contributor’ country and a senior author from the ‘senior’ country. ‘without’ lists the number of preprints that include an author from the ‘contributor’ country but do not list a senior author from the ‘senior’ country. ‘seniortotal’ lists the total number of senior-author preprints attributed to the country in the ‘senior’ column. ‘padj’ lists the p-value from the ‘p’ column, adjusted to control the false-discovery rate using the Benjamini–Hochberg procedure. [file elife-58496-fig3-data2.csv]

contributor	senior	p	with	without	seniortotal	padj
Bangladesh	Australia	7.65E-14	22	61	847	2.60E-12
Thailand	United Kingdom of Great Britain and Northern Ireland	2.79E-06	50	137	3345	4.73E-05
Greece	United Kingdom of Great Britain and Northern Ireland	1.03E-04	39	114	3345	1.16E-03
Turkey	United States of America	1.87E-03	52	83	6428	1.21E-02
Kenya	United Kingdom of Great Britain and Northern Ireland	2.13E-03	26	79	3345	1.21E-02
Vietnam	United Kingdom of Great Britain and Northern Ireland	1.54E-03	19	48	3345	1.21E-02
Iceland	United Kingdom of Great Britain and Northern Ireland	8.23E-03	19	58	3345	4.00E-02
Turkey	Germany	1.36E-02	16	119	1550	5.78E-02
Ecuador	United States of America	2.62E-02	25	40	6428	9.88E-02
Uganda	United States of America	3.36E-02	29	50	6428	1.14E-01
Tanzania	United Kingdom of Great Britain and Northern Ireland	4.01E-02	15	52	3345	1.24E-01
Estonia	Australia	4.84E-02	10	145	847	1.37E-01
Thailand	United States of America	6.07E-02	60	127	6428	1.59E-01
Iceland	United States of America	6.73E-02	27	50	6428	1.64E-01
Czechia	Germany	7.99E-02	20	201	1550	1.81E-01
Estonia	United Kingdom of Great Britain and Northern Ireland	8.79E-02	28	127	3345	1.86E-01
Peru	United States of America	9.28E-02	19	34	6428	1.86E-01
Kenya	United States of America	1.18E-01	34	71	6428	2.23E-01
Uganda	United Kingdom of Great Britain and Northern Ireland	1.29E-01	15	64	3345	2.31E-01
Slovakia	United States of America	1.82E-01	17	34	6428	3.01E-01
Croatia	United Kingdom of Great Britain and Northern Ireland	1.86E-01	15	69	3345	3.01E-01
Colombia	United States of America	2.93E-01	43	105	6428	4.52E-01
Bangladesh	United States of America	3.69E-01	24	59	6428	5.45E-01
Tanzania	United States of America	5.40E-01	18	49	6428	7.64E-01
Egypt	United Kingdom of Great Britain and Northern Ireland	6.44E-01	10	67	3345	8.76E-01
Colombia	United Kingdom of Great Britain and Northern Ireland	6.85E-01	19	129	3345	8.96E-01
Czechia	United States of America	8.46E-01	53	168	6428	9.52E-01
Greece	United States of America	8.41E-01	36	117	6428	9.52E-01
Estonia	United States of America	9.52E-01	33	122	6428	9.52E-01
Czechia	United Kingdom of Great Britain and Northern Ireland	9.52E-01	23	198	3345	9.52E-01
Croatia	United States of America	8.93E-01	18	66	6428	9.52E-01
Egypt	United States of America	7.87E-01	18	59	6428	9.52E-01
Turkey	United Kingdom of Great Britain and Northern Ireland	9.48E-01	13	122	3345	9.52E-01
Czechia	France	7.70E-01	10	211	1308	9.52E-01
