# Supplementary material for: International authorship and collaboration across bioRxiv preprints
Source: eLife. 2020 Jul 27;9:e58496. doi: 10.7554/eLife.58496 (PMC7384855; doi:10.7554/eLife.58496)
Supplement: Figure 3—source data 3. — Each row represents a country, in alphabetical order by the ‘country’ column. The ‘country’ column indicates the country name as recorded in the ROR dataset. ‘alpha2’ indicates the two-letter country code defined in ISO 3166–1. ‘intl_senior_author’ lists, of bioRxiv preprints that include authors from at least two countries, the number for which the final author in the author list specified an affiliation to an institution in the specified country. ‘intl_any_author’ lists, of bioRxiv preprints that include authors from at least two countries, the number for which at least one author (in any position) specified an affiliation to an institution in the specified country. ‘all_any_author’ lists the number of bioRxiv preprints—international or not—for which at least one author (in any position) specified an affiliation to an institution in that country. ‘intl_senior_rate’ is the ‘intl_senior_author’ column divided by the ‘intl_any_author’ column. ‘intl_collab_rate’ is the ‘intl_any_author’ column divided by ‘all_any_author’ column. The ‘contributor’ column lists a boolean value indicating whether the specified country meets the criteria of being a ‘contributor country’: a value of at least 50 in the ‘intl_any_author’ column and a value of less than 0.2 in the ‘intl_senior_rate’ column. [file elife-58496-fig3-data3.csv]

country	alpha2	intl_senior_author	intl_any_author	all_any_author	intl_senior_rate	intl_collab_rate	contributor
Afghanistan	AF	1	1	2	1.00000000000000000000	0.50000000000000000000	FALSE
Algeria	DZ	1	5	6	0.20000000000000000000	0.83333333333333333333	FALSE
Argentina	AR	77	232	327	0.33189655172413793103	0.70948012232415902141	FALSE
Armenia	AM	0	5	9	0.00000000000000000000	0.55555555555555555556	FALSE
Australia	AU	887	2339	3260	0.37922188969645147499	0.71748466257668711656	FALSE
Austria	AT	188	682	817	0.27565982404692082111	0.83476132190942472460	FALSE
Azerbaijan	AZ	1	4	4	0.25000000000000000000	1.00000000000000000000	FALSE
Bahrain	BH	2	3	3	0.66666666666666666667	1.00000000000000000000	FALSE
Bangladesh	BD	16	98	132	0.16326530612244897959	0.74242424242424242424	TRUE
Barbados	BB	3	19	19	0.15789473684210526316	1.00000000000000000000	FALSE
Belarus	BY	0	13	13	0.00000000000000000000	1.00000000000000000000	FALSE
Belgium	BE	268	877	1101	0.30558722919042189282	0.79654859218891916440	FALSE
Belize	BZ	0	0	1	0.00000000000000000000	0.00000000000000000000	FALSE
Benin	BJ	6	38	40	0.15789473684210526316	0.95000000000000000000	FALSE
Bermuda	BM	0	10	11	0.00000000000000000000	0.90909090909090909091	FALSE
Bolivia (Plurinational State of),	BO	3	14	15	0.21428571428571428571	0.93333333333333333333	FALSE
Bosnia and Herzegovina	BA	0	5	6	0.00000000000000000000	0.83333333333333333333	FALSE
Botswana	BW	1	4	4	0.25000000000000000000	1.00000000000000000000	FALSE
Brazil	BR	270	982	1460	0.27494908350305498982	0.67260273972602739726	FALSE
Brunei Darussalam	BN	2	5	6	0.40000000000000000000	0.83333333333333333333	FALSE
Bulgaria	BG	7	36	44	0.19444444444444444444	0.81818181818181818182	FALSE
Burkina Faso	BF	3	38	40	0.07894736842105263158	0.95000000000000000000	FALSE
Burundi	BI	0	9	9	0.00000000000000000000	1.00000000000000000000	FALSE
Cabo Verde	CV	0	2	2	0.00000000000000000000	1.00000000000000000000	FALSE
Cambodia	KH	2	21	21	0.09523809523809523810	1.00000000000000000000	FALSE
Cameroon	CM	11	38	43	0.28947368421052631579	0.88372093023255813953	FALSE
Canada	CA	990	2943	4409	0.33639143730886850153	0.66749829893399863915	FALSE
Central African Republic	CF	0	2	2	0.00000000000000000000	1.00000000000000000000	FALSE
Chile	CL	75	224	277	0.33482142857142857143	0.80866425992779783394	FALSE
China	CN	828	2568	4609	0.32242990654205607477	0.55717075287481015405	FALSE
Colombia	CO	36	184	221	0.19565217391304347826	0.83257918552036199095	TRUE
Congo, Democratic Republic of the	CD	2	13	13	0.15384615384615384615	1.00000000000000000000	FALSE
Costa Rica	CR	7	35	45	0.20000000000000000000	0.77777777777777777778	FALSE
Croatia	HR	13	97	104	0.13402061855670103093	0.93269230769230769231	TRUE
Cuba	CU	10	36	36	0.27777777777777777778	1.00000000000000000000	FALSE
Curaçao	CW	1	2	3	0.50000000000000000000	0.66666666666666666667	FALSE
Cyprus	CY	8	33	39	0.24242424242424242424	0.84615384615384615385	FALSE
Czechia	CZ	66	298	380	0.22147651006711409396	0.78421052631578947368	FALSE
Côte d'Ivoire	CI	29	129	139	0.22480620155038759690	0.92805755395683453237	FALSE
Denmark	DK	362	1178	1417	0.30730050933786078098	0.83133380381086803105	FALSE
Dominican Republic	DO	1	7	7	0.14285714285714285714	1.00000000000000000000	FALSE
Ecuador	EC	12	77	85	0.15584415584415584416	0.90588235294117647059	TRUE
Egypt	EG	14	93	120	0.15053763440860215054	0.77500000000000000000	TRUE
El Salvador	SV	0	1	1	0.00000000000000000000	1.00000000000000000000	FALSE
Estonia	EE	29	185	205	0.15675675675675675676	0.90243902439024390244	TRUE
Eswatini	SZ	0	1	1	0.00000000000000000000	1.00000000000000000000	FALSE
Ethiopia	ET	12	55	106	0.21818181818181818182	0.51886792452830188679	FALSE
Faroe Islands	FO	0	1	1	0.00000000000000000000	1.00000000000000000000	FALSE
Fiji	FJ	0	8	9	0.00000000000000000000	0.88888888888888888889	FALSE
Finland	FI	213	718	873	0.29665738161559888579	0.82245131729667812142	FALSE
France	FR	1418	3686	5218	0.38469886055344546934	0.70640091989267918743	FALSE
French Guiana	GF	0	9	9	0.00000000000000000000	1.00000000000000000000	FALSE
French Polynesia	PF	0	7	7	0.00000000000000000000	1.00000000000000000000	FALSE
Gabon	GA	3	11	11	0.27272727272727272727	1.00000000000000000000	FALSE
Gambia	GM	3	12	12	0.25000000000000000000	1.00000000000000000000	FALSE
Georgia	GE	0	12	12	0.00000000000000000000	1.00000000000000000000	FALSE
Germany	DE	1787	5161	7157	0.34625072660337143964	0.72111219784826044432	FALSE
Ghana	GH	13	58	71	0.22413793103448275862	0.81690140845070422535	FALSE
Greece	GR	25	180	221	0.13888888888888888889	0.81447963800904977376	TRUE
Greenland	GL	0	11	18	0.00000000000000000000	0.61111111111111111111	FALSE
Grenada	GD	0	6	6	0.00000000000000000000	1.00000000000000000000	FALSE
Guadeloupe	GP	0	4	4	0.00000000000000000000	1.00000000000000000000	FALSE
Guatemala	GT	4	11	12	0.36363636363636363636	0.91666666666666666667	FALSE
Guinea	GN	0	1	1	0.00000000000000000000	1.00000000000000000000	FALSE
Guinea-Bissau	GW	3	16	16	0.18750000000000000000	1.00000000000000000000	FALSE
Guyana	GY	0	1	3	0.00000000000000000000	0.33333333333333333333	FALSE
Haiti	HT	0	4	4	0.00000000000000000000	1.00000000000000000000	FALSE
Honduras	HN	0	5	5	0.00000000000000000000	1.00000000000000000000	FALSE
Hungary	HU	68	250	311	0.27200000000000000000	0.80385852090032154341	FALSE
Iceland	IS	18	95	106	0.18947368421052631579	0.89622641509433962264	TRUE
India	IN	342	858	1769	0.39860139860139860140	0.48501978518937252685	FALSE
Indonesia	ID	7	60	72	0.11666666666666666667	0.83333333333333333333	TRUE
Iran (Islamic Republic of),	IR	29	133	238	0.21804511278195488722	0.55882352941176470588	FALSE
Iraq	IQ	2	18	22	0.11111111111111111111	0.81818181818181818182	FALSE
Ireland	IE	93	358	441	0.25977653631284916201	0.81179138321995464853	FALSE
Israel	IL	296	728	1091	0.40659340659340659341	0.66727772685609532539	FALSE
Italy	IT	412	1583	1929	0.26026531901452937461	0.82063245204769310524	FALSE
Jamaica	JM	1	15	15	0.06666666666666666667	1.00000000000000000000	FALSE
Japan	JP	368	1340	2287	0.27462686567164179104	0.58592041976388281592	FALSE
Jersey	JE	0	2	2	0.00000000000000000000	1.00000000000000000000	FALSE
Jordan	JO	0	10	11	0.00000000000000000000	0.90909090909090909091	FALSE
Kazakhstan	KZ	1	10	11	0.10000000000000000000	0.90909090909090909091	FALSE
Kenya	KE	19	125	157	0.15200000000000000000	0.79617834394904458599	TRUE
Korea (Democratic People's Republic of),	KP	0	1	1	0.00000000000000000000	1.00000000000000000000	FALSE
Korea, Republic of	KR	139	468	707	0.29700854700854700855	0.66195190947666195191	FALSE
Kuwait	KW	1	15	19	0.06666666666666666667	0.78947368421052631579	FALSE
Kyrgyzstan	KG	1	2	2	0.50000000000000000000	1.00000000000000000000	FALSE
Lao People's Democratic Republic	LA	1	9	9	0.11111111111111111111	1.00000000000000000000	FALSE
Latvia	LV	1	18	20	0.05555555555555555556	0.90000000000000000000	FALSE
Lebanon	LB	2	20	21	0.10000000000000000000	0.95238095238095238095	FALSE
Liberia	LR	0	1	1	0.00000000000000000000	1.00000000000000000000	FALSE
Libya	LY	0	3	3	0.00000000000000000000	1.00000000000000000000	FALSE
Liechtenstein	LI	0	1	1	0.00000000000000000000	1.00000000000000000000	FALSE
Lithuania	LT	3	25	29	0.12000000000000000000	0.86206896551724137931	FALSE
Luxembourg	LU	15	64	76	0.23437500000000000000	0.84210526315789473684	FALSE
Macao	MO	8	21	26	0.38095238095238095238	0.80769230769230769231	FALSE
Madagascar	MG	2	19	19	0.10526315789473684211	1.00000000000000000000	FALSE
Malawi	MW	7	40	41	0.17500000000000000000	0.97560975609756097561	FALSE
Malaysia	MY	32	123	171	0.26016260162601626016	0.71929824561403508772	FALSE
Maldives	MV	0	1	1	0.00000000000000000000	1.00000000000000000000	FALSE
Mali	ML	0	12	12	0.00000000000000000000	1.00000000000000000000	FALSE
Malta	MT	0	1	1	0.00000000000000000000	1.00000000000000000000	FALSE
Martinique	MQ	0	1	1	0.00000000000000000000	1.00000000000000000000	FALSE
Mauritania	MR	1	1	1	1.00000000000000000000	1.00000000000000000000	FALSE
Mauritius	MU	0	1	1	0.00000000000000000000	1.00000000000000000000	FALSE
Mexico	MX	80	315	438	0.25396825396825396825	0.71917808219178082192	FALSE
Moldova, Republic of	MD	0	2	2	0.00000000000000000000	1.00000000000000000000	FALSE
Monaco	MC	2	8	8	0.25000000000000000000	1.00000000000000000000	FALSE
Mongolia	MN	2	10	10	0.20000000000000000000	1.00000000000000000000	FALSE
Montenegro	ME	0	1	1	0.00000000000000000000	1.00000000000000000000	FALSE
Morocco	MA	2	16	20	0.12500000000000000000	0.80000000000000000000	FALSE
Mozambique	MZ	2	7	8	0.28571428571428571429	0.87500000000000000000	FALSE
Myanmar	MM	0	1	1	0.00000000000000000000	1.00000000000000000000	FALSE
Namibia	NA	0	3	3	0.00000000000000000000	1.00000000000000000000	FALSE
Nepal	NP	10	27	33	0.37037037037037037037	0.81818181818181818182	FALSE
Netherlands	NL	674	2114	2764	0.31882686849574266793	0.76483357452966714906	FALSE
New Caledonia	NC	0	3	3	0.00000000000000000000	1.00000000000000000000	FALSE
New Zealand	NZ	111	372	513	0.29838709677419354839	0.72514619883040935673	FALSE
Nicaragua	NI	1	3	4	0.33333333333333333333	0.75000000000000000000	FALSE
Nigeria	NG	7	48	86	0.14583333333333333333	0.55813953488372093023	FALSE
North Macedonia	MK	0	4	6	0.00000000000000000000	0.66666666666666666667	FALSE
Norway	NO	222	715	898	0.31048951048951048951	0.79621380846325167038	FALSE
Oman	OM	3	11	11	0.27272727272727272727	1.00000000000000000000	FALSE
Pakistan	PK	20	99	129	0.20202020202020202020	0.76744186046511627907	FALSE
Palestine, State of	PS	1	9	11	0.11111111111111111111	0.81818181818181818182	FALSE
Panama	PA	36	103	111	0.34951456310679611650	0.92792792792792792793	FALSE
Papua New Guinea	PG	0	12	12	0.00000000000000000000	1.00000000000000000000	FALSE
Paraguay	PY	0	1	1	0.00000000000000000000	1.00000000000000000000	FALSE
Peru	PE	16	83	91	0.19277108433734939759	0.91208791208791208791	TRUE
Philippines	PH	25	98	125	0.25510204081632653061	0.78400000000000000000	FALSE
Poland	PL	82	384	492	0.21354166666666666667	0.78048780487804878049	FALSE
Portugal	PT	130	412	543	0.31553398058252427184	0.75874769797421731123	FALSE
Qatar	QA	32	140	162	0.22857142857142857143	0.86419753086419753086	FALSE
Romania	RO	8	48	59	0.16666666666666666667	0.81355932203389830508	FALSE
Russian Federation	RU	126	504	685	0.25000000000000000000	0.73576642335766423358	FALSE
Rwanda	RW	1	6	7	0.16666666666666666667	0.85714285714285714286	FALSE
Réunion	RE	3	10	11	0.30000000000000000000	0.90909090909090909091	FALSE
Saint Kitts and Nevis	KN	0	2	2	0.00000000000000000000	1.00000000000000000000	FALSE
Saudi Arabia	SA	54	196	230	0.27551020408163265306	0.85217391304347826087	FALSE
Senegal	SN	0	30	31	0.00000000000000000000	0.96774193548387096774	FALSE
Serbia	RS	0	22	27	0.00000000000000000000	0.81481481481481481481	FALSE
Seychelles	SC	0	3	3	0.00000000000000000000	1.00000000000000000000	FALSE
Sierra Leone	SL	0	1	1	0.00000000000000000000	1.00000000000000000000	FALSE
Singapore	SG	184	548	701	0.33576642335766423358	0.78174037089871611983	FALSE
Slovakia	SK	6	58	65	0.10344827586206896552	0.89230769230769230769	TRUE
Slovenia	SI	11	55	65	0.20000000000000000000	0.84615384615384615385	FALSE
South Africa	ZA	110	411	492	0.26763990267639902676	0.83536585365853658537	FALSE
South Sudan	SS	0	1	1	0.00000000000000000000	1.00000000000000000000	FALSE
Spain	ES	504	1658	2162	0.30398069963811821472	0.76688251618871415356	FALSE
Sri Lanka	LK	14	43	52	0.32558139534883720930	0.82692307692307692308	FALSE
Sudan	SD	11	35	74	0.31428571428571428571	0.47297297297297297297	FALSE
Suriname	SR	0	1	1	0.00000000000000000000	1.00000000000000000000	FALSE
Sweden	SE	460	1548	1895	0.29715762273901808786	0.81688654353562005277	FALSE
Switzerland	CH	690	2072	2779	0.33301158301158301158	0.74559193954659949622	FALSE
Syrian Arab Republic	SY	1	7	7	0.14285714285714285714	1.00000000000000000000	FALSE
Taiwan, Province of China	TW	87	274	406	0.31751824817518248175	0.67487684729064039409	FALSE
Tanzania, United Republic of	TZ	6	73	79	0.08219178082191780822	0.92405063291139240506	TRUE
Thailand	TH	28	215	243	0.13023255813953488372	0.88477366255144032922	TRUE
Togo	TG	1	6	6	0.16666666666666666667	1.00000000000000000000	FALSE
Trinidad and Tobago	TT	1	19	21	0.05263157894736842105	0.90476190476190476190	FALSE
Tunisia	TN	3	17	18	0.17647058823529411765	0.94444444444444444444	FALSE
Turkey	TR	32	168	225	0.19047619047619047619	0.74666666666666666667	TRUE
Turkmenistan	TM	1	1	1	1.00000000000000000000	1.00000000000000000000	FALSE
Uganda	UG	5	84	93	0.05952380952380952381	0.90322580645161290323	TRUE
Ukraine	UA	5	25	40	0.20000000000000000000	0.62500000000000000000	FALSE
United Arab Emirates	AE	5	39	43	0.12820512820512820513	0.90697674418604651163	FALSE
United Kingdom of Great Britain and Northern Ireland	GB	3534	7798	11578	0.45319312644267760964	0.67351874244256348247	FALSE
United States of America	US	6862	14084	34676	0.48721953990343652371	0.40615988003229899642	FALSE
Uruguay	UY	21	82	95	0.25609756097560975610	0.86315789473684210526	FALSE
Uzbekistan	UZ	0	2	3	0.00000000000000000000	0.66666666666666666667	FALSE
Venezuela (Bolivarian Republic of),	VE	20	85	94	0.23529411764705882353	0.90425531914893617021	FALSE
Viet Nam	VN	6	73	76	0.08219178082191780822	0.96052631578947368421	TRUE
Yemen	YE	2	12	12	0.16666666666666666667	1.00000000000000000000	FALSE
Zambia	ZM	3	12	12	0.25000000000000000000	1.00000000000000000000	FALSE
Zimbabwe	ZW	2	9	12	0.22222222222222222222	0.75000000000000000000	FALSE
