# Supplementary material for: International authorship and collaboration across bioRxiv preprints
Source: eLife. 2020 Jul 27;9:e58496. doi: 10.7554/eLife.58496 (PMC7384855; doi:10.7554/eLife.58496)
Supplement: Figure 4—source data 1. — Each row represents a country, sorted in descending order by the ‘published’ and ‘total’ columns. The ‘country’ column indicates the country name as recorded in the ROR dataset. ‘total’ lists the number of preprints last updated prior to 2019 that list a senior author who declared an affiliation in the specified country. ‘published’ lists, of the preprints counted in the ‘total’ column, the number that are listed as published on the bioRxiv website. [file elife-58496-fig4-data1.csv]

country	total	published
United States of America	14573	9642
United Kingdom of Great Britain and Northern Ireland	3998	2625
UNKNOWN	3471	1813
Germany	1861	1268
France	1437	953
China	1355	588
Canada	1262	821
Australia	958	623
Switzerland	724	505
Netherlands	667	445
Japan	599	365
India	591	291
Spain	517	321
Sweden	439	288
Italy	407	232
Brazil	336	166
Israel	330	196
Denmark	297	197
Belgium	248	161
Norway	196	129
Korea, Republic of	187	95
Singapore	173	102
Finland	165	105
Russian Federation	156	82
Austria	145	96
New Zealand	142	100
Portugal	137	88
Taiwan, Province of China	97	43
South Africa	93	60
Poland	84	49
Mexico	83	51
Argentina	71	43
Czechia	68	41
Ireland	67	49
Iran (Islamic Republic of),	64	28
Chile	59	27
Hungary	57	37
Saudi Arabia	51	30
Turkey	46	24
Colombia	39	14
Malaysia	37	13
Estonia	30	18
Philippines	29	17
Pakistan	28	7
Greece	28	20
Qatar	27	12
Thailand	25	13
Panama	23	14
Nigeria	23	14
Ethiopia	22	6
Côte d'Ivoire	22	17
Luxembourg	19	10
Bangladesh	19	6
Egypt	18	4
Kenya	17	6
Sudan	15	4
Iceland	15	11
Croatia	15	8
Uruguay	13	6
Ghana	13	6
Slovenia	11	9
Venezuela (Bolivarian Republic of),	9	8
Ukraine	9	4
Peru	9	7
Sri Lanka	8	4
Slovakia	8	4
Romania	8	4
Costa Rica	8	2
Bulgaria	8	5
Macao	7	4
Nepal	6	2
Indonesia	6	2
Greenland	6	4
Cyprus	6	3
Cameroon	6	1
United Arab Emirates	5	3
Ecuador	5	0
Viet Nam	4	1
Uganda	4	2
Morocco	4	1
Malawi	4	1
Benin	4	3
Zimbabwe	3	1
Tanzania, United Republic of	3	1
Iraq	3	2
Gabon	3	2
Cuba	3	1
Armenia	3	1
Tunisia	2	1
Trinidad and Tobago	2	0
Palestine, State of	2	2
Mozambique	2	1
Guyana	2	0
Guatemala	2	2
Brunei Darussalam	2	0
Algeria	2	1
Afghanistan	2	1
Zambia	1	1
Uzbekistan	1	0
Turkmenistan	1	1
Serbia	1	0
Senegal	1	0
Réunion	1	1
Rwanda	1	1
Nicaragua	1	1
Mongolia	1	0
Monaco	1	0
Madagascar	1	1
Lithuania	1	0
Latvia	1	0
Lao People's Democratic Republic	1	0
Guinea-Bissau	1	0
Dominican Republic	1	1
Curaçao	1	0
Cambodia	1	0
Burkina Faso	1	0
Bolivia (Plurinational State of),	1	0
